# Supplementary material
Source: MDPI journal article supplement (https://www.mdpi.com/2571-8789/7/3/70)

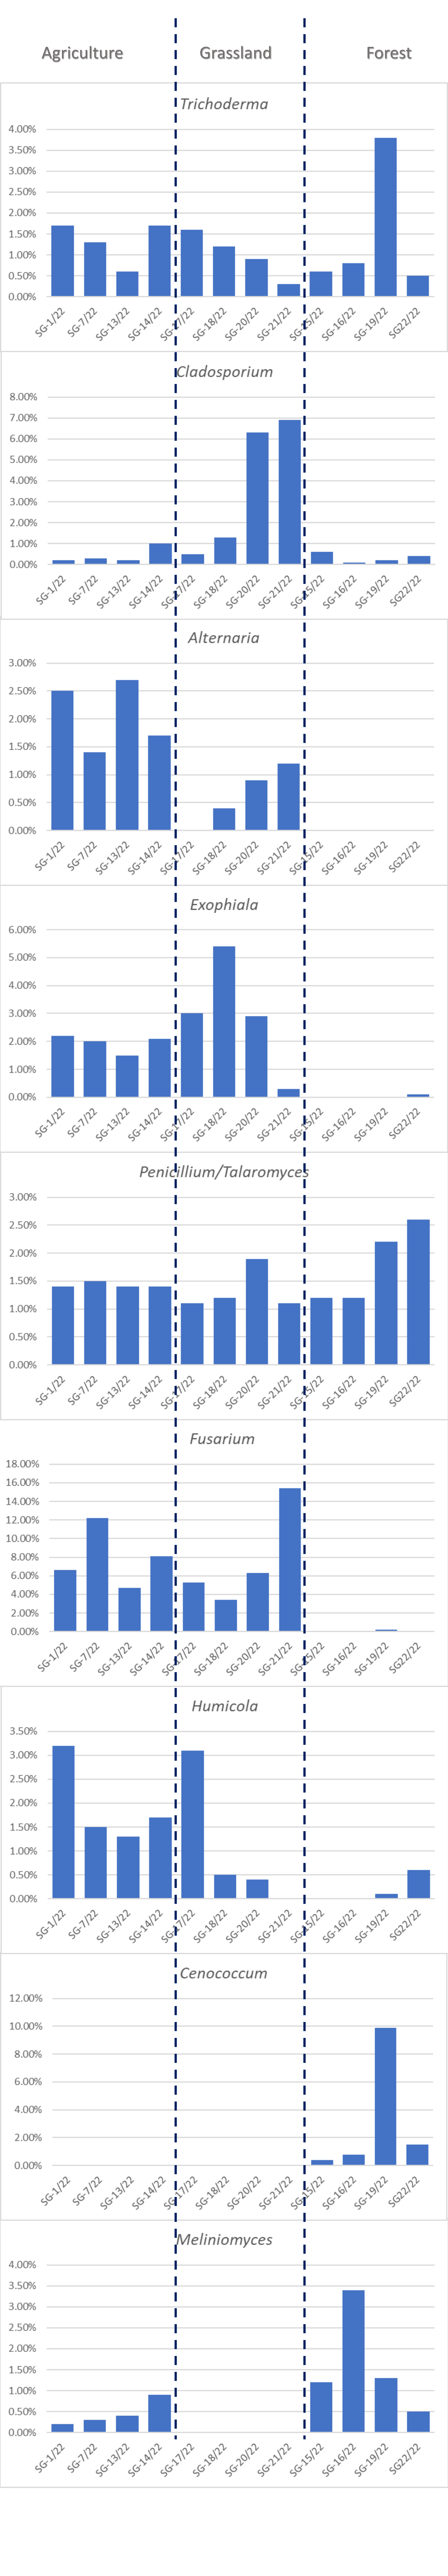

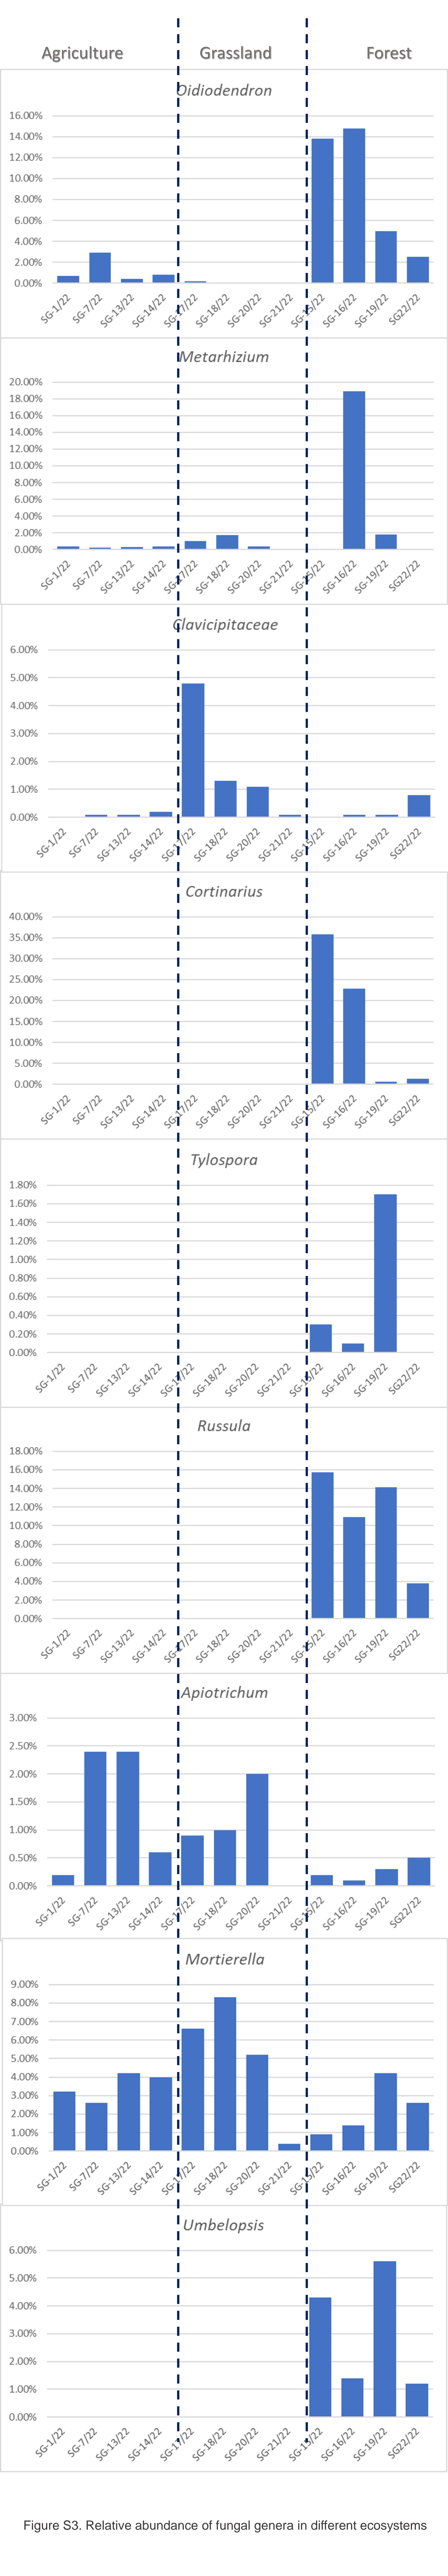

Figure S3. Relative abundance of fungal genera in different ecosystems

Supplement: s1 [file s1]

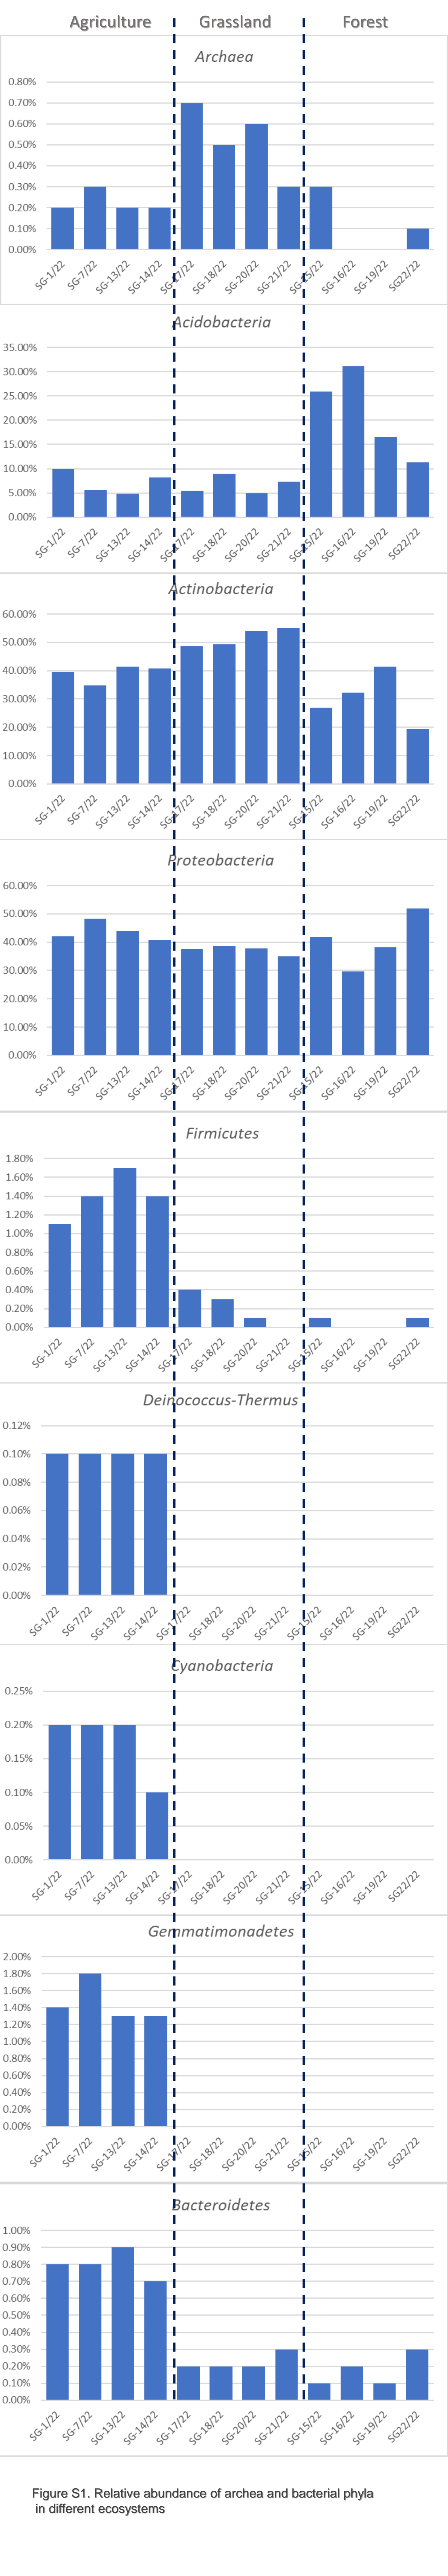

Supplement: s1 [file s1 › Figure S1.pdf]

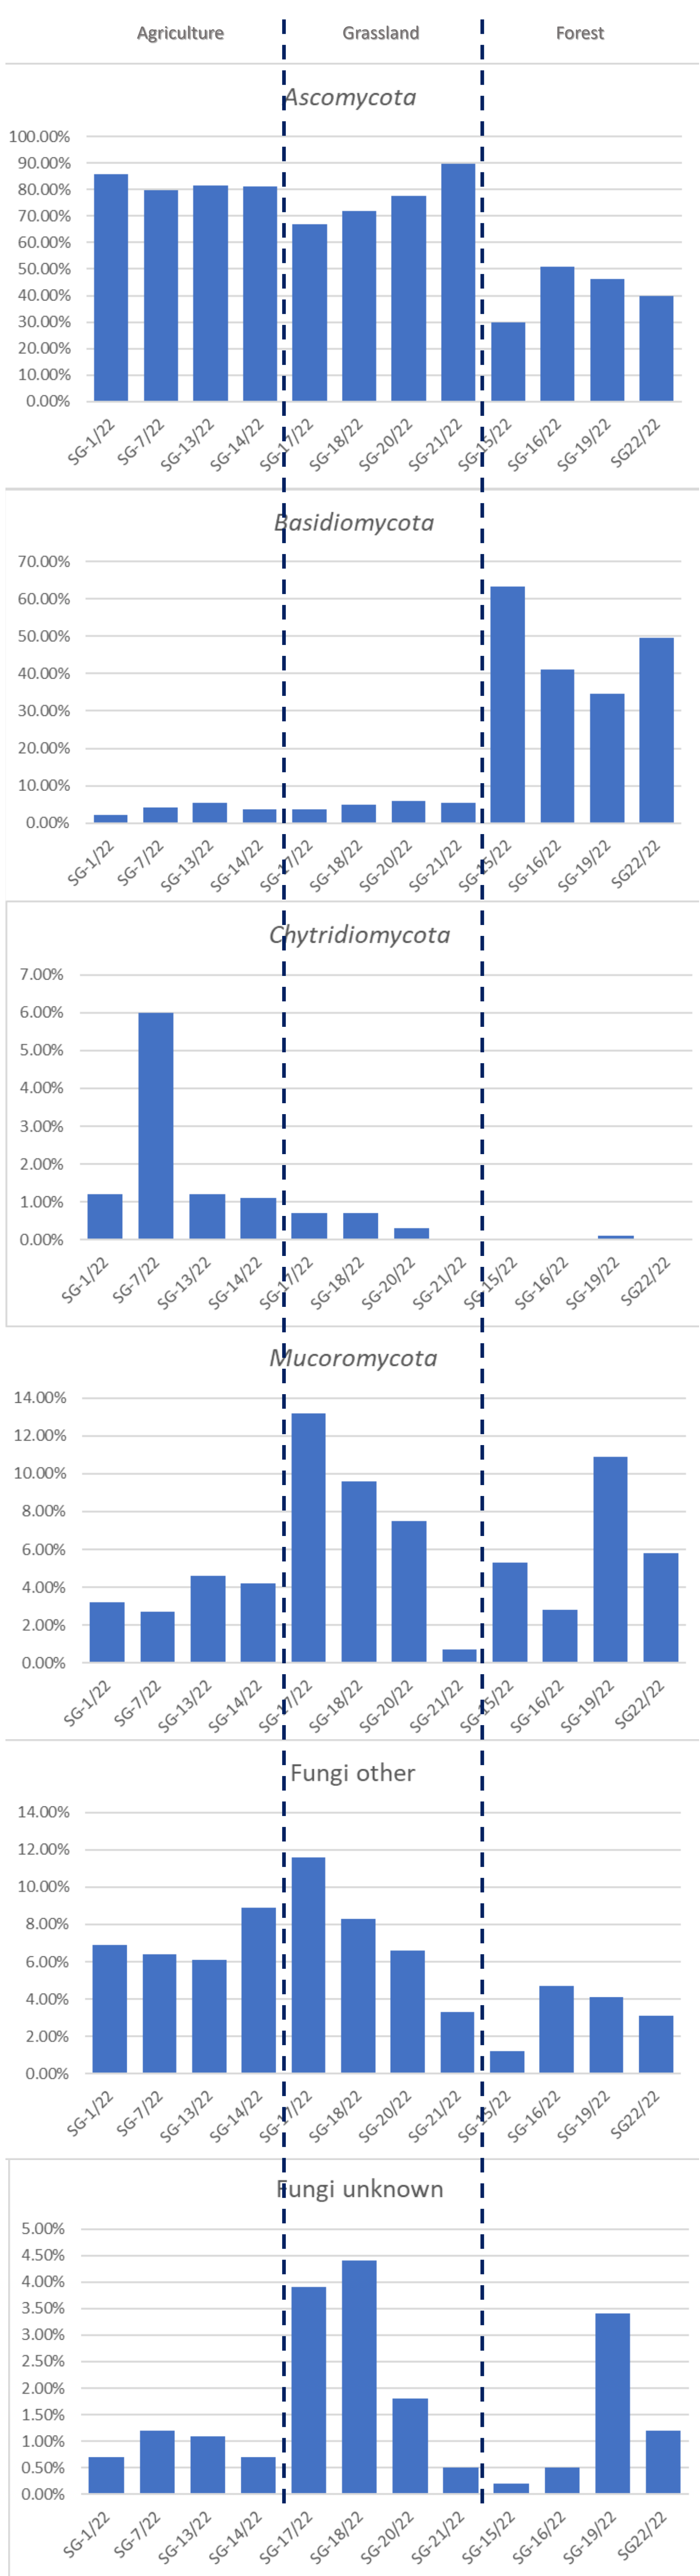

Figure S2. Relative abundance of fungal phyla in different ecosystems

Supplement: s1 [file s1 › Figure S2.pdf]
